# Supplementary material
Source: Springer Nature journal article supplement (https://www.springermedizin.de/resource/supplementary/12967_2013_1738_MOESM6_ESM.pdf/9575194)

**A**

Brown fat  
(shoulder girdles)

Heart

Tumor

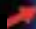**B**

1.2 cm

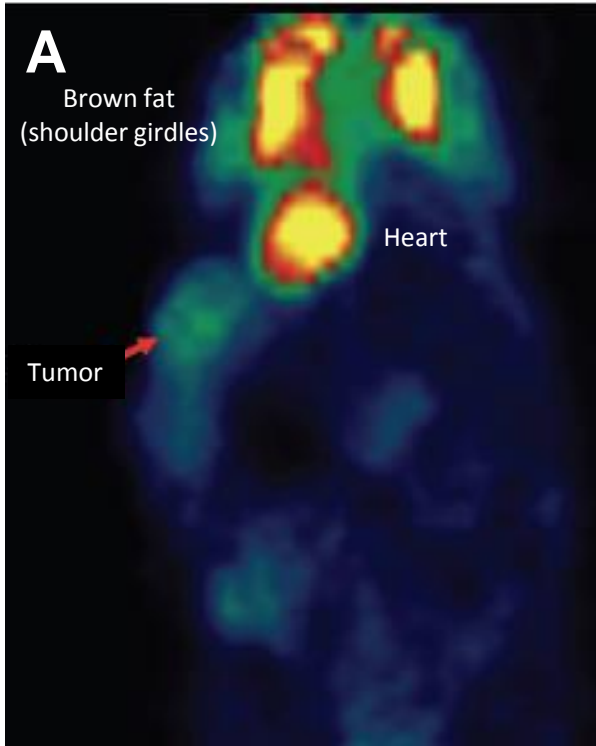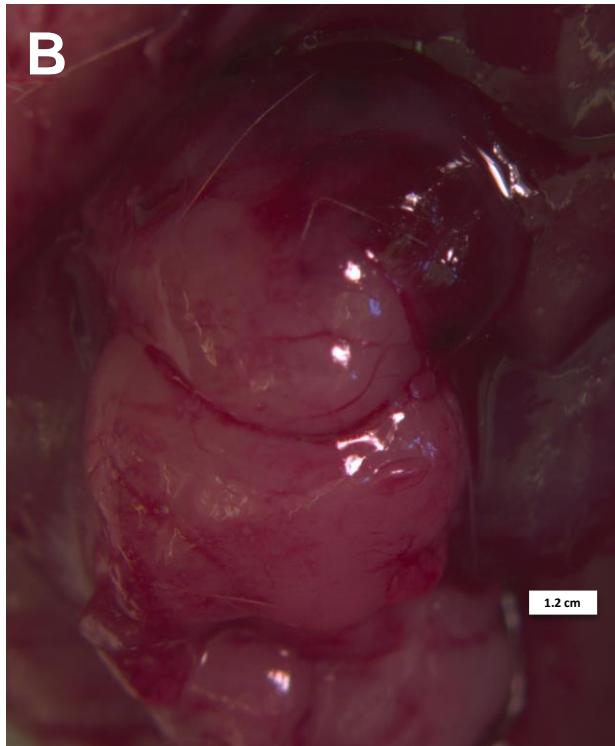

Supplement: MOESM6 [file 9575194]
